# Supplementary material for: Dietary Olive Leaf Extract Differentially Modulates Antioxidant Defense of Normal and Aeromonas hydrophila-Infected Common Carp (Cyprinus carpio) via Keap1/Nrf2 Pathway Signaling: A Phytochemical and Biological Link
Source: MDPI journal article supplement (doi:10.3390/ani13132229), 2023-07-06
Supplement: s1 [file s1]

## Supplementary Materials

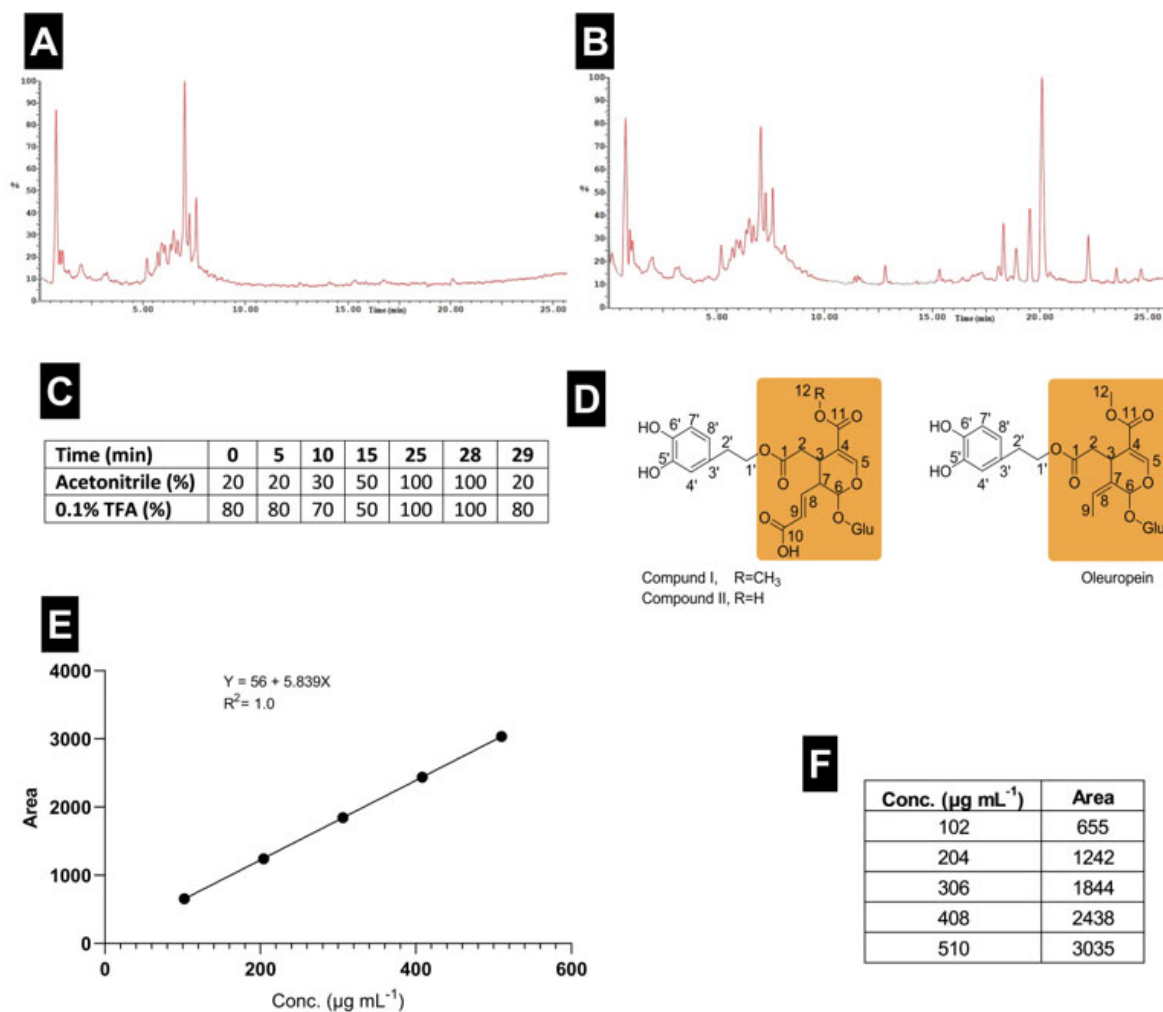

**Supplementary Figure S1.** HPLC analysis result of Olive leaf extract. Sample of 0.546 g/100 mL was prepared.  $Y = 5.8392X + 56$ . (A) UPLC-ESI-MS total ion chromatogram of olive leaf extract in ESI- mode. (B) UPLC-ESI-MS total ion chromatogram of olive leaf extract in ESI+ mode. (C) HPLC elution method for estimation of oleuropein. (D) Structures of oleuropein and isolated compounds (I and II). (E,F) Standard calibrating curve of oleuropein standard. Peak area= 6552 conc 1112.5 µg mL<sup>-1</sup>, 1.1125 mg mL<sup>-1</sup>, 111.25 mg/100 mL/0.546 g extract. Each 100 g contain 20.4 g **Oleuropein** (20.4 %).

**Supplementary Table S1.** Phytochemical profile of olive leaf extract by UPLC-ESI-MS/MS in negative and positive ion modes .

| NO. | Rt min | [M-H] <sup>-</sup><br>m/z | [M+H] <sup>+</sup><br>m/z | MS <sup>2</sup> Ions<br>m/z                                                      | Identification                    |
|-----|--------|---------------------------|---------------------------|----------------------------------------------------------------------------------|-----------------------------------|
| 1   | 0.77   | 195                       |                           | 129, 99, 75                                                                      | Gluconic acid                     |
| 2   | 0.96   | 191                       |                           | 111, 87, 85                                                                      | Citric acid                       |
| 3   | 1.25   | 153                       |                           | 141, 109                                                                         | Protocatechuic                    |
| 4   | 2.60   | 305                       |                           | 261, 243, 237, 219, 203, 191, 179, 167, 165, 139, 137, 125, 111, 109, 97, 95, 81 | Gallocatechin                     |
| 5   | 3.24   | 593                       | 595                       | 447, 285, 133                                                                    | Vicenin II, Luteolin-O-rutinoside |
| 6   | 3.94   | 565                       |                           | 403, 371, 223, 181, 165, 139, 127, 121, 119, 113, 101, 89                        | Elenolic acid diglucoside         |
| 7   | 4.50   | 163                       |                           | 163, 117                                                                         | <i>p</i> -Coumaric acid           |
| 8   | 4.63   | 609                       |                           | 463, 301, 300, 179, 151                                                          | Rutin                             |
| 9   | 4.76   | 403                       |                           | 371, 359, 183, 165, 151, 121, 119, 115, 113, 101                                 | Oleoside methyl ester             |
| 10  | 5.20   |                           | *427                      |                                                                                  |                                   |
|     | 5.22   | 403                       |                           | 371, 223, 181, 165, 139, 127, 121, 119, 113, 101, 89                             | Elenolic acid hexoside            |
| 11  |        | 525                       |                           | 481, 389, 209, 195, 183, 165, 121, 119, 113, 89                                  | Demethyloleuropein                |
| 12  | 5.72   | 609                       |                           | 447, 285                                                                         | Luteolin diglucoide               |
| 13  |        | 555                       |                           | 537, 403, 393, 323, 183                                                          | Hydroxy-oleuropein                |
| 14  | 5.91   |                           | 579                       | 271                                                                              | Apigenin-7-O-rutinoside           |
| 15  |        |                           | 595                       | 287                                                                              | Cyanidin-3-rutinoside             |
| 16  |        | 179                       |                           | 135, 134, 89                                                                     | Caffeic acid                      |
| 17  | 5.88   | 315                       |                           | 153, 135, 123                                                                    | Hydroxytyrosol hexoside           |
| 18  |        | 623                       |                           | 461, 315, 179, 161                                                               | Verbascoside                      |
| 19  | 6.10   | 447                       |                           | 301                                                                              | Quercitrin                        |
| 20  |        | 153                       |                           | 123, 109                                                                         | Hydroxytyrosol                    |
| 21  |        | 623                       |                           | 461, 315, 179, 161                                                               | Isoverbascoside                   |
| 22  | 6.35   | 447                       |                           | 285, 175, 133                                                                    | Luteolin hexoside I               |
| 23  | 6.35   | 543                       |                           | 197, 153                                                                         | Dihydro-oleuropein                |
|     | 22.25  | 284*                      |                           |                                                                                  |                                   |
| 24  |        | 431                       | 433                       | 269, 268, 117                                                                    | Apigenin-7-O-glucoside            |
| 25  | 6.50   | 447                       |                           | 285, 284, 197, 175, 133                                                          | Luteolin hexoside II              |
| 26  | 6.51   | 701                       |                           | 377, 307, 175                                                                    | Neo-nuzhenide                     |
| 27  |        | 461                       | 463                       | 315, 297, 153, 135, 113                                                          | Verbascoside                      |
| 28  | 6.71   | 447                       |                           | 285                                                                              | Luteolin hexoside III             |
| 29  | 6.92   | 569                       |                           | 539, 407, 377                                                                    | Compound II                       |
| 30  | 7.03   | 539                       |                           | 403, 377, 371, 327, 307, 275, 223, 179, 165, 149, 139                            | Oleuropein                        |
|     | 20.11  | 282**                     |                           |                                                                                  |                                   |
| 31  |        | 359                       |                           | 197, 153, 135, 107                                                               | 7-Deoxyloganic acid               |
| 32  | 7.04   | 137                       |                           | 109, 108, 93, 92                                                                 | <i>p</i> -Hydroxybenzoic acid     |
| 33  | 7.15   | 539                       |                           | 377, 307, 275                                                                    | Oleuropein isomer                 |
| 34  | 7.26   | 137                       |                           | 107                                                                              | Tyrosol                           |
| 35  | 7.28   | 539                       |                           | 377, 307, 275                                                                    | Oleuroside                        |
| 36  | 7.61   | 523                       | 547*                      | 361, 291, 259, 223, 127, 101                                                     | Ligustroside                      |
|     | 11.54  |                           | 274**                     |                                                                                  |                                   |
| 37  | 8.15   | 925                       |                           | 893, 763, 745, 693, 539, 521, 377, 307                                           | Jaspolyoside                      |
| 38  | 8.85   | 375                       |                           | 213, 169, 151, 125, 113, 107                                                     | Loganic acid                      |
| 39  | 9.14   | 377                       |                           | 275, 165, 149, 139, 127, 111, 95                                                 | Oleuropein aglycone               |
| 40  | 11.93  | 405                       |                           | 377, 275                                                                         | Dimethyl oleuropein aglycone      |
| 41  | 18.08  |                           | 425*                      | 425                                                                              | Secologanic acid                  |
| 42  | 18.31  |                           | 280**                     | -                                                                                | Dehydro oleuropein                |
| 43  | 18.90  |                           | 439*                      | 439                                                                              | Acetoxypinoresinol                |

|    |       |      |          |               |
|----|-------|------|----------|---------------|
| 44 |       | 455  | 455      | Oleanoic acid |
| 45 | 23.35 | 607  | 607, 541 | Compound I    |
| 46 | 24.68 | 413* | 413      | Oleoside      |

\* denotes for  $[M+Na]^+$  adduct; \*\* denotes for  $[M+H+Na]^+$  adduct.
